# Supplementary material
Source: PubMed Central journal article supplement (PMC11529724)
Supplement: NIHMS2029841-supplement-Supplementary_Information.pdf [file NIHMS2029841-supplement-Supplementary_Information.pdf]

# Structural basis for $\alpha$ -tubulin-specific and modification state-dependent glutamylation

---

In the format provided by the authors and unedited

---

**Supplementary Table 1. Cryo-EM data collection statistics.**

| <b>Data collection</b>                     |                                               |                                           |                                       |
|--------------------------------------------|-----------------------------------------------|-------------------------------------------|---------------------------------------|
| Microscope                                 | Talos Arctica                                 |                                           |                                       |
| Detector                                   | K2 Summit                                     |                                           |                                       |
| Data collection software                   | Leginon                                       |                                           |                                       |
| Nominal magnification                      | 36,000x                                       |                                           |                                       |
| Voltage (kV)                               | 200                                           |                                           |                                       |
| Electron exposure ( $e^-/\text{\AA}^2$ )   | 42                                            |                                           |                                       |
| Exposure rate ( $e^-/\text{pixel/s}$ )     | 5.5                                           |                                           |                                       |
| Defocus range ( $\mu\text{m}$ )            | -1.0 to -2.0                                  |                                           |                                       |
| Pixel size ( $\text{\AA}$ )                | 1.15                                          |                                           |                                       |
| Time per frame (s)                         | 0.250                                         |                                           |                                       |
| Total exposure time (s)                    | 9.75                                          |                                           |                                       |
| Frames per movie                           | 39                                            |                                           |                                       |
| Movies collected                           | 2,771                                         |                                           |                                       |
| <b>Image processing</b>                    |                                               |                                           |                                       |
|                                            | <b>Microtubule-TTLL6 map<br/>(EMDB-41018)</b> | <b>TTLL6 focused map<br/>(EMDB-41022)</b> | <b>Composite map<br/>(EMDB-41090)</b> |
| Symmetry imposed                           | C1                                            | C1                                        | C1                                    |
| Initial particle images                    | 59,044(microtubule segments)                  | 392,289                                   |                                       |
| Final particle images                      | 392,289(protofilament particles)              | 151,716                                   |                                       |
| Map resolution ( $\text{\AA}$ )            | 3.6                                           | 7.2                                       | 3.7                                   |
| FSC threshold                              | 0.143                                         | 0.143                                     | 0.143                                 |
| Map resolution range ( $\text{\AA}$ )      | 3 to 14                                       | 5 to 14                                   | 3 to 14                               |
| Map sharpening B factor ( $\text{\AA}^2$ ) |                                               | -18                                       |                                       |

**Supplementary Table 2. Model refinement and validation statistics.**

| <b>Two protofilament<br/>microtubule-TTL6 model<br/>(EMDB-41018)<br/>(PDB 8T42)</b> |                                     |
|-------------------------------------------------------------------------------------|-------------------------------------|
| Atomic modeling refinement packages                                                 | Phenix, Coot                        |
| Initial model used (PDB code)                                                       | 6VZU, 5N5N                          |
| Model resolution (Å)                                                                | 3.5                                 |
| FSC threshold                                                                       | 0.143                               |
| Model composition                                                                   |                                     |
| Non-hydrogen atoms                                                                  | 13,864                              |
| Protein residues                                                                    | 1,752                               |
| Ligands                                                                             | 2 GTP; 2 GMPCPP; 4 Mg <sup>2+</sup> |
| <i>B</i> factors (Å <sup>2</sup> )                                                  |                                     |
| Protein                                                                             | 99.3                                |
| Ligand                                                                              | 95.8                                |
| R.M.S. Deviations                                                                   |                                     |
| Bond lengths (Å)                                                                    | 0.007                               |
| Bond angles (°)                                                                     | 1.434                               |
| Validation                                                                          |                                     |
| MolProbity score                                                                    | 1.46 (100 <sup>th</sup> percentile) |
| Clashscore                                                                          | 3.82 (100 <sup>th</sup> percentile) |
| Poor rotamers                                                                       | 2 (0.13%)                           |
| EMRinger score                                                                      | 2.40                                |
| Ramachandran plot                                                                   |                                     |
| Favored                                                                             | 1,678 (95.8%)                       |
| Allowed                                                                             | 74 (4.2%)                           |
| Disallowed                                                                          | 0                                   |
| Rama-Z score                                                                        |                                     |
| whole                                                                               | -1.35                               |
| helix                                                                               | 0.12                                |
| sheet                                                                               | -2.25                               |
| loop                                                                                | -1.29                               |
| Model vs. Data                                                                      |                                     |
| CC(volume)                                                                          | 0.82                                |
| CC(mask)                                                                            | 0.82                                |

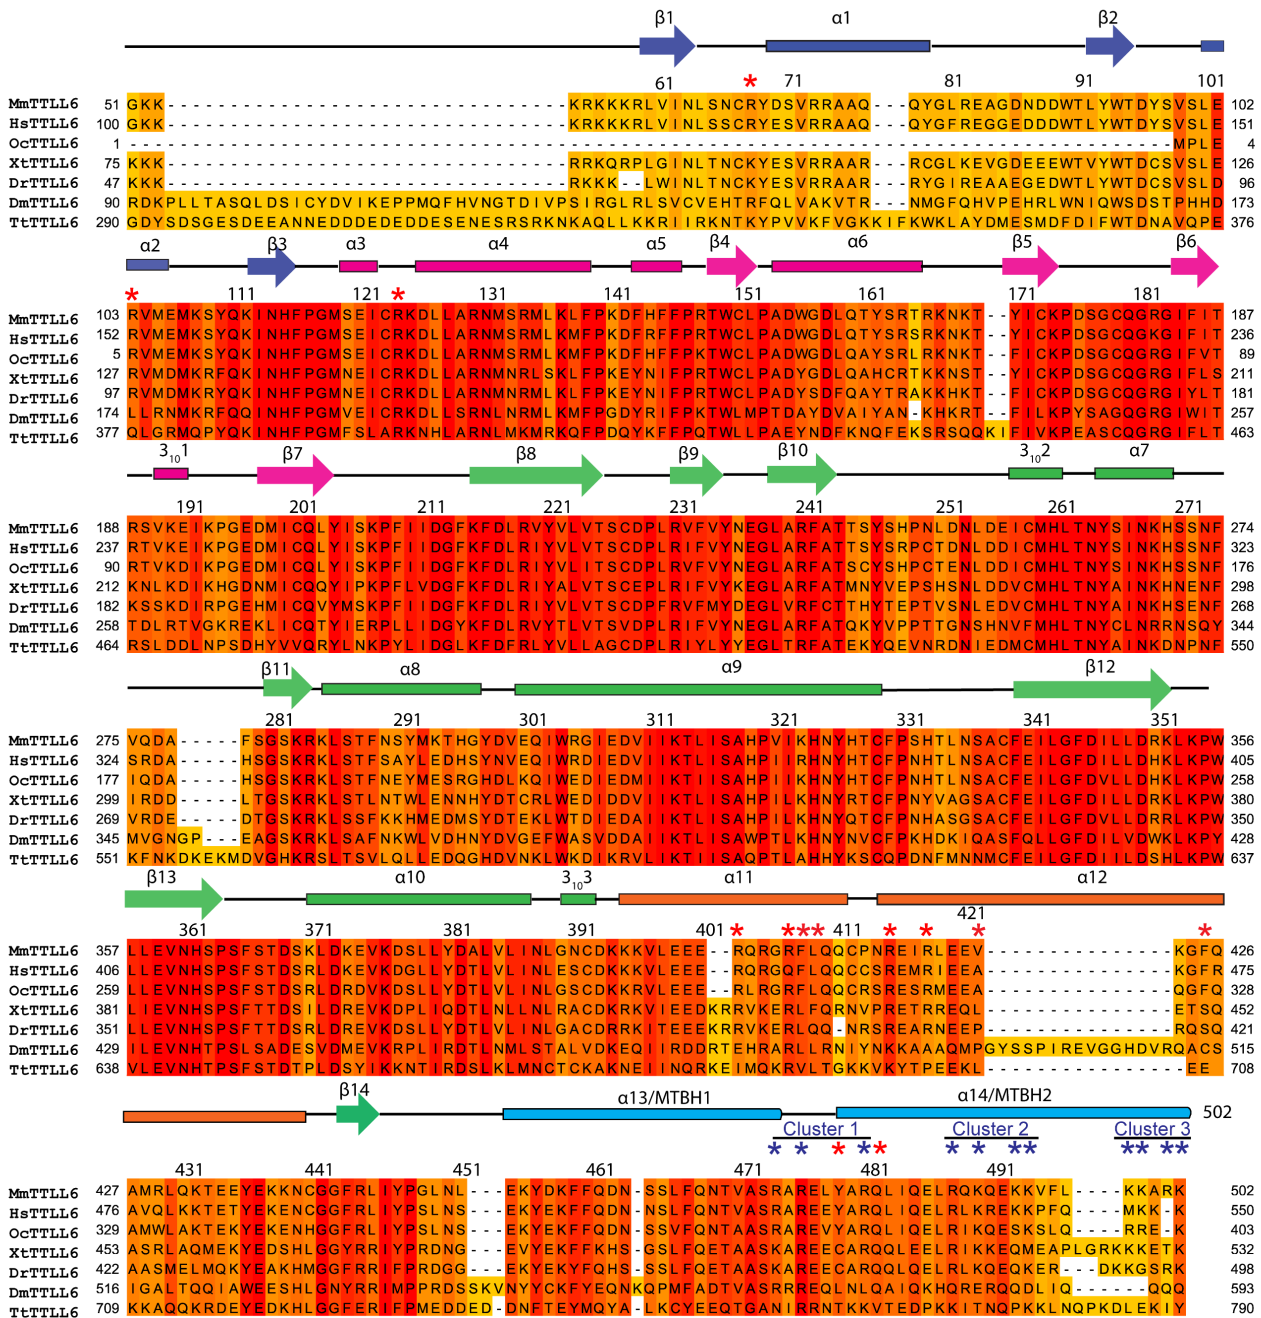

### Supplementary Fig. 1. TLL6 sequence conservation.

TLL6 sequences belonging to Mm- *Mus musculus*, Hs- *Homo sapiens*, Oc- *Oryctolagus cuniculus*, Xt- *Xenopus tropicalis*, Dr- *Danio rerio*, Dm- *Drosophila melanogaster*, Tt- *Tetrahymena thermophila*, were aligned using Clustal omega in Jalview<sup>1</sup>. Secondary structure elements are indicated above the corresponding sequence. Residues in the cationic clusters in the MTBH1-2 are marked with blue asterisks. Other residues important for microtubule recognition are marked using a red asterisk on top.

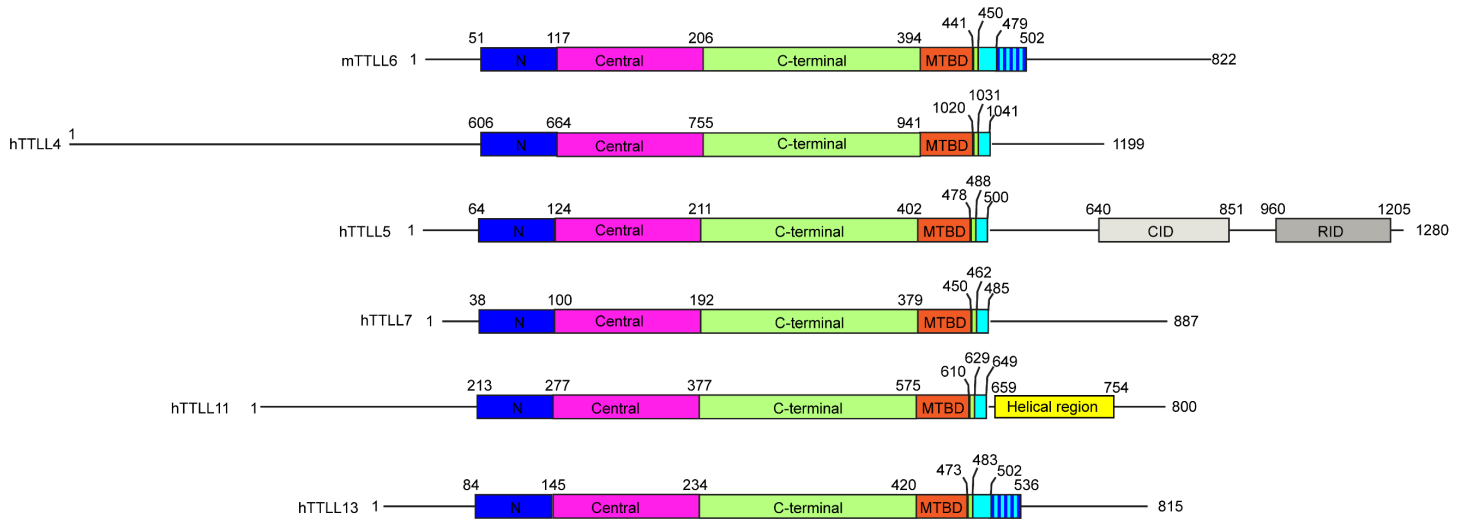

**Supplementary Fig. 2. Structure based sequence-based alignment showing the absence of a cationic MTBH2 in TLL initiases, TLL4 and 5.**

Domain organization of autonomous TLL glutamylases with TLL6 shown at the top followed by TLL4, 5, 7, 11 and 13 showing the lack of a cationic MTBH2 in TLL4, 5, 7 and 11. TLL 4, 5 and 7 prefer to initiate glutamate chains<sup>2-6</sup>. The MTBH2 is clearly missing in TLL4 and 5. TLL7 has an MTBH2 which misses critical positively charged residue and folds against its core<sup>2</sup>. TLL13 has a clearly defined MTBH1-2. Unlike TLL6 and 13, TLL11 lacks a single helical feature similar to MTBH2 but its MTBH1 is followed by a helical bundle (highlighted in yellow), with positively-charged residues, whose function could be analogous to MTBH2. The N-, central-, C- and MTBD domains are shown in blue, magenta, green and orange, respectively. MTBH1 is shown in cyan and the cationic MTBH2 in TLL6 is shown in cyan with blue stripes indicating the location of arginine and lysine rich regions. The cofactor interaction domain (CID) and receptor interaction domain (RID) of TLL5 are shown in grey.

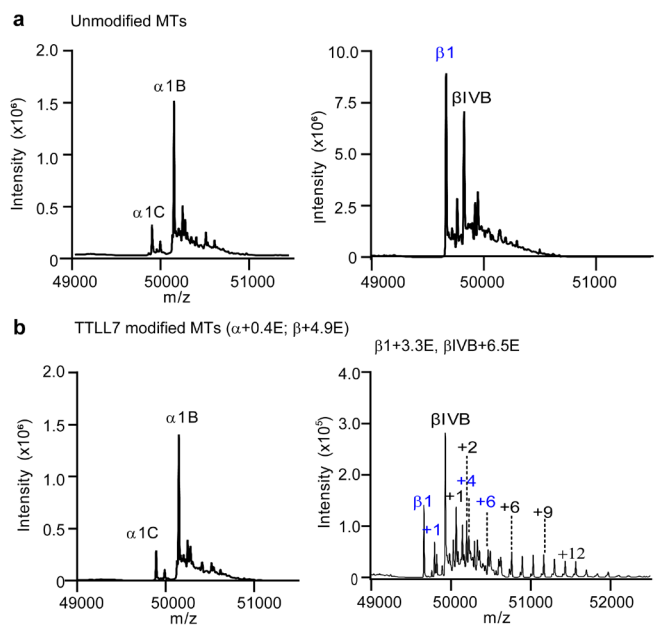

### Supplementary Fig. 3. TLL7 glutamylated microtubules.

**a, b.** LC-MS spectra of unmodified (a) and TLL7 glutamylated microtubules used in TIRF-based microtubule binding assays in Figures 7a-c (b) (Methods). Tubulin isotypes and the number of glutamates post-translationally added by TLL7 are indicated on top. The mean number of glutamates added to each tubulin isotype after TLL7 treatment is shown above the spectra and was calculated as described previously<sup>7,8</sup>.

## References:

1. Waterhouse, A.M., Procter, J.B., Martin, D.M., Clamp, M., and Barton, G.J. (2009). Jalview Version 2--a multiple sequence alignment editor and analysis workbench. *Bioinformatics* 25, 1189-1191. 10.1093/bioinformatics/btp033.
2. Garnham, C.P., Vemu, A., Wilson-Kubalek, E.M., Yu, I., Szyk, A., Lander, G.C., Milligan, R.A., and Roll-Mecak, A. (2015). Multivalent Microtubule Recognition by Tubulin Tyrosine Ligase-like Family Glutamylases. *Cell* 161, 1112-1123. 10.1016/j.cell.2015.04.003.
3. Janke, C., Rogowski, K., Wloga, D., Regnard, C., Kajava, A.V., Strub, J.M., Temurak, N., van Dijk, J., Boucher, D., van Dorsselaer, A., et al. (2005). Tubulin polyglutamylase enzymes are members of the TTL domain protein family. *Science* 308, 1758-1762. 10.1126/science.1113010.
4. Mahalingan, K.K., Keith Keenan, E., Strickland, M., Li, Y., Liu, Y., Ball, H.L., Tanner, M.E., Tjandra, N., and Roll-Mecak, A. (2020). Structural basis for polyglutamate chain initiation and elongation by TTLL family enzymes. *Nat Struct Mol Biol* 27, 802-813. 10.1038/s41594-020-0462-0.
5. Mukai, M., Ikegami, K., Sugiura, Y., Takeshita, K., Nakagawa, A., and Setou, M. (2009). Recombinant mammalian tubulin polyglutamylase TTLL7 performs both initiation and elongation of polyglutamylation on beta-tubulin through a random sequential pathway. *Biochemistry* 48, 1084-1093. 10.1021/bi802047y.
6. van Dijk, J., Rogowski, K., Miro, J., Lacroix, B., Edde, B., and Janke, C. (2007). A targeted multienzyme mechanism for selective microtubule polyglutamylation. *Mol Cell* 26, 437-448. 10.1016/j.molcel.2007.04.012.
7. Szczesna, E., Zehr, E.A., Cummings, S.W., Szyk, A., Mahalingan, K.K., Li, Y., and Roll-Mecak, A. (2022). Combinatorial and antagonistic effects of tubulin glutamylation and glycylation on katanin microtubule severing. *Dev Cell* 57, 2497-2513 e2496. 10.1016/j.devcel.2022.10.003.
8. Valenstein, M.L., and Roll-Mecak, A. (2016). Graded Control of Microtubule Severing by Tubulin Glutamylation. *Cell* 164, 911-921. 10.1016/j.cell.2016.01.019.
